# Supplementary material for: Strepchazolins A and B: Two New Alkaloids from a Marine Streptomyces chartreusis NA02069
Source: PubMed Central journal article supplement (PMC5577599; doi:10.3390/md15080244), 2017-08-02
Supplement: marinedrugs-15-00244-s001.pdf [file marinedrugs-15-00244-s001.pdf]

## SUPPORTING INFORMATION

# Strepchazolins A and B: Two New Alkaloids from a Marine *Streptomyces chartreusis* NA02069

Cheng Long Yang<sup>1</sup>, Yi Shuang Wang<sup>1</sup>, Cheng Li Liu<sup>1</sup>, Ying Jie Zeng<sup>1</sup>, Ping Cheng<sup>1</sup>, Rui Hua Jiao<sup>1</sup>, Shixiang Bao<sup>3</sup>, Huiqin Huang<sup>3,\*</sup>, Ren Xiang Tan<sup>1,2,\*</sup>, and Hui Ming Ge<sup>1,\*</sup>

- <sup>1</sup> State Key Laboratory of Pharmaceutical Biotechnology, Institute of Functional Biomolecules, School of Life Sciences, Nanjing University, Nanjing 210023, China;
- <sup>2</sup> State Key Laboratory Cultivation Base for TCM Quality and Efficacy, Nanjing University of Chinese Medicine, Nanjing 210023, China;
- <sup>3</sup> Institute of Tropical Biosciences and Biotechnology, Key Laboratory of Biology and Genetic Resources of Tropical Crops of Ministry of Agriculture, Chinese Academy of Tropical Agricultural Sciences, Haikou 571101, China;

### Supplementary Materials

|                                                                                                                                                 |    |
|-------------------------------------------------------------------------------------------------------------------------------------------------|----|
| <b>Table S1.</b> NMR data (methanol- <i>d</i> <sub>4</sub> , <sup>1</sup> H 600 MHz, <sup>13</sup> C 150 MHz) for <b>2a</b> and <b>2b</b> ..... | 2  |
| <b>Figure S1.</b> HRESIMS of compound <b>1</b> .....                                                                                            | 2  |
| <b>Figure S2.</b> <sup>1</sup> H NMR spectrum for <b>1</b> in methanol- <i>d</i> <sub>4</sub> (600 MHz).....                                    | 3  |
| <b>Figure S3.</b> <sup>13</sup> C NMR spectrum for <b>1</b> in methanol- <i>d</i> <sub>4</sub> (150 MHz).....                                   | 3  |
| <b>Figure S4.</b> DEPT spectrum for <b>1</b> in methanol- <i>d</i> <sub>4</sub> (150 MHz).....                                                  | 4  |
| <b>Figure S5.</b> COSY spectrum for <b>1</b> in methanol- <i>d</i> <sub>4</sub> (600 MHz).....                                                  | 4  |
| <b>Figure S6.</b> HSQC spectrum for <b>1</b> in methanol- <i>d</i> <sub>4</sub> (600 MHz).....                                                  | 5  |
| <b>Figure S7.</b> HMBC spectrum for <b>1</b> in methanol- <i>d</i> <sub>4</sub> (600 MHz).....                                                  | 5  |
| <b>Figure S8.</b> NOESY spectrum for <b>1</b> in methanol- <i>d</i> <sub>4</sub> (600 MHz).....                                                 | 6  |
| <b>Figure S9.</b> HRESIMS of compound <b>2</b> .....                                                                                            | 6  |
| <b>Figure S10.</b> <sup>1</sup> H NMR spectrum for <b>2</b> in methanol- <i>d</i> <sub>4</sub> (600 MHz).....                                   | 7  |
| <b>Figure S11.</b> <sup>13</sup> C NMR spectrum for <b>2</b> in methanol- <i>d</i> <sub>4</sub> (150 MHz).....                                  | 7  |
| <b>Figure S12.</b> DEPT spectrum for <b>2</b> in methanol- <i>d</i> <sub>4</sub> (150 MHz).....                                                 | 8  |
| <b>Figure S13.</b> COSY spectrum for <b>2</b> in methanol- <i>d</i> <sub>4</sub> (600 MHz).....                                                 | 9  |
| <b>Figure S14.</b> HSQC spectrum for <b>2</b> in methanol- <i>d</i> <sub>4</sub> (600 MHz).....                                                 | 9  |
| <b>Figure S15.</b> HMBC spectrum for <b>2</b> in methanol- <i>d</i> <sub>4</sub> (600 MHz).....                                                 | 10 |
| <b>Figure S16.</b> NOESY spectrum for <b>2</b> in methanol- <i>d</i> <sub>4</sub> (600 MHz).....                                                | 10 |
| <b>Figure S17.</b> Comparison of the <sup>1</sup> H NMR spectra of compounds <b>1</b> and <b>2</b> .....                                        | 11 |
| <b>Figure S18.</b> Comparison of the <sup>13</sup> C NMR spectra of compounds <b>1</b> and <b>2</b> .....                                       | 11 |

**Table S1.** NMR data (methanol-*d*<sub>4</sub>, <sup>1</sup>H 600 MHz, <sup>13</sup>C 150 MHz) for **2a** and **2b**

| Position | $\delta_{H-2a}$ | $\delta_{H-2b}$ | $\Delta\delta_H = \delta_{H-2a} - \delta_{H-2b}$ |
|----------|-----------------|-----------------|--------------------------------------------------|
| 1        | 1.4690          | 1.5365          | -0.0675                                          |
| 2        | 5.8839          | 5.8571          | +0.0268                                          |
| 3        | -               | -               | -                                                |
| 4        | 5.8746          | 5.6154          | +0.2592                                          |
| 5        | 4.5786          | 4.4903          | +0.0883                                          |
| 6        | 4.3181          | 4.2601          | +0.058                                           |
| 7        | -               | -               | -                                                |
| 8        | 6.0121          | 5.9029          | +0.1092                                          |
| 9        | 2.2954          | 2.1815          | +0.1139                                          |
| 10       | 3.8312, 3.1716  | 3.8021, 3.1250  | +0.0291, +0.0466                                 |
| 11       | -               | -               | -                                                |
| 12       | 1.9911          | 2.0353          | -0.0442                                          |

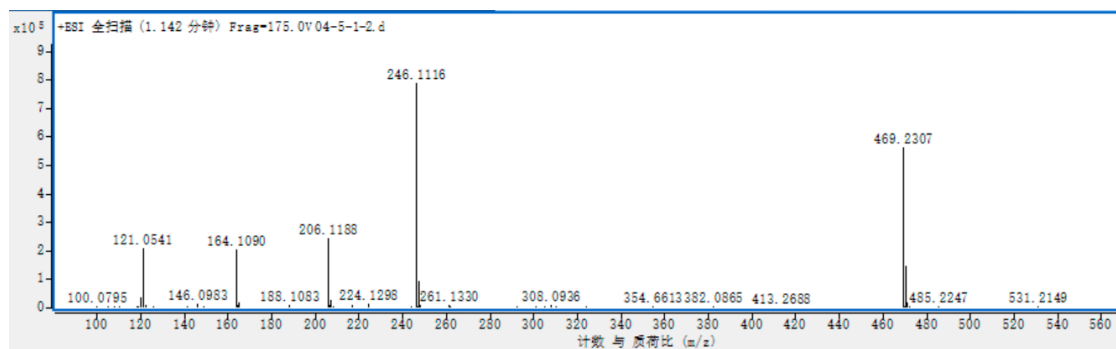

**Figure S1.** HRESIMS of compound **1**

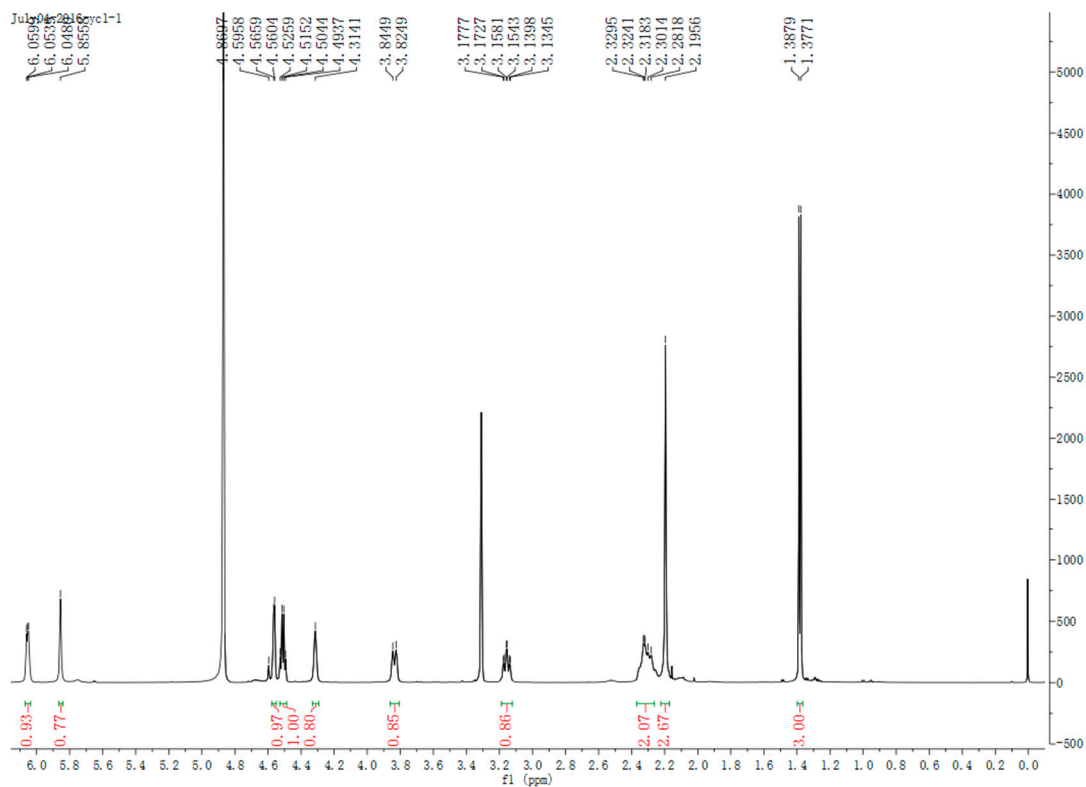

**Figure S2.**  $^1\text{H}$  NMR spectrum for **1** in methanol- $d_4$  (600 MHz)

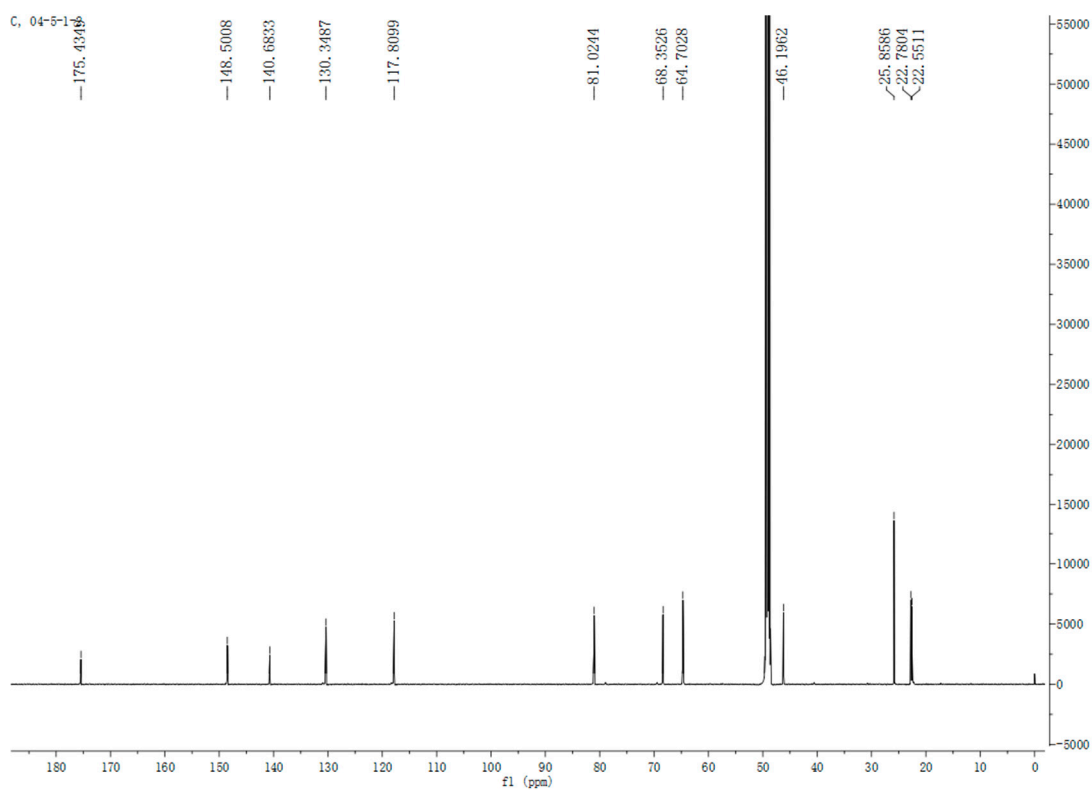

**Figure S3.**  $^{13}\text{C}$  NMR spectrum for **1** in methanol- $d_4$  (150 MHz)

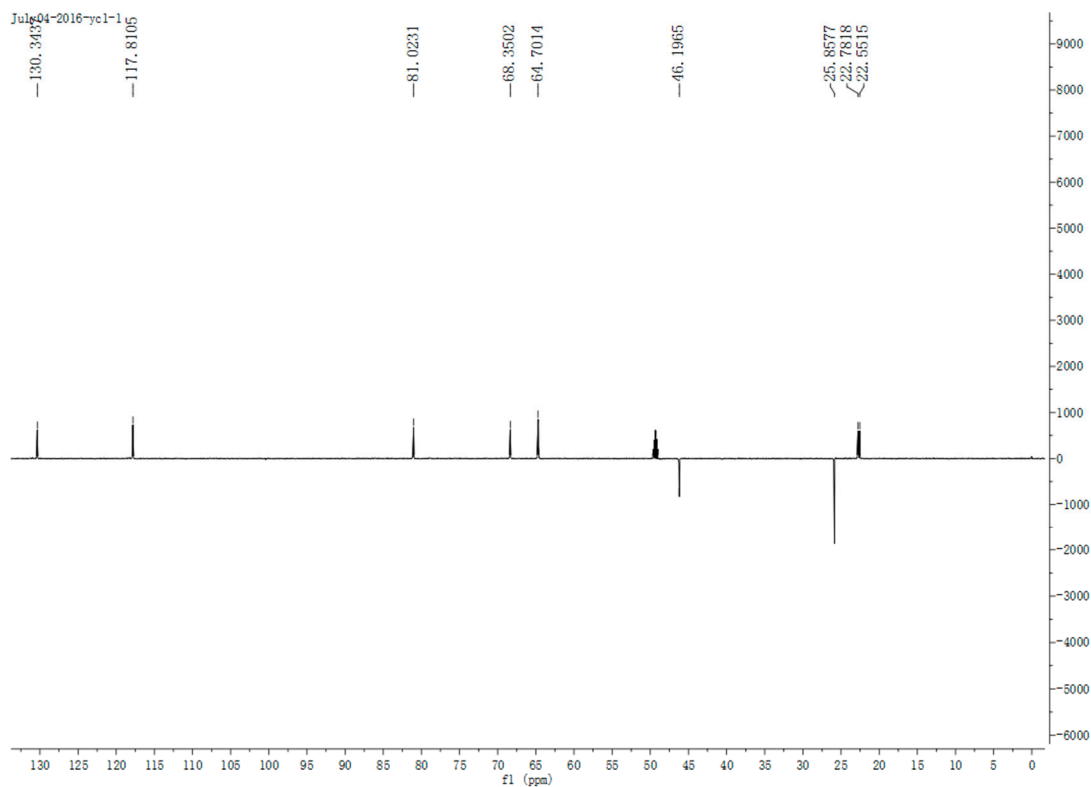

**Figure S4.** DEPT spectrum for **1** in methanol- $d_4$  (150 MHz)

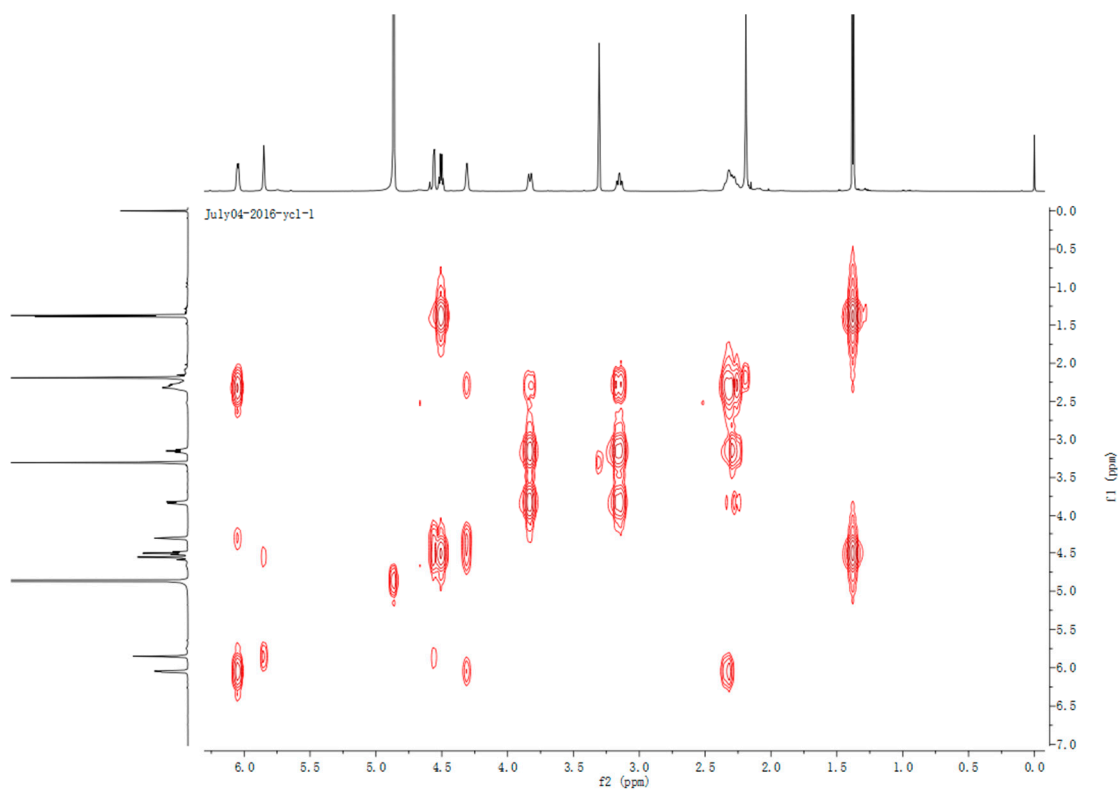

**Figure S5.** COSY spectrum for **1** in methanol- $d_4$  (600 MHz)

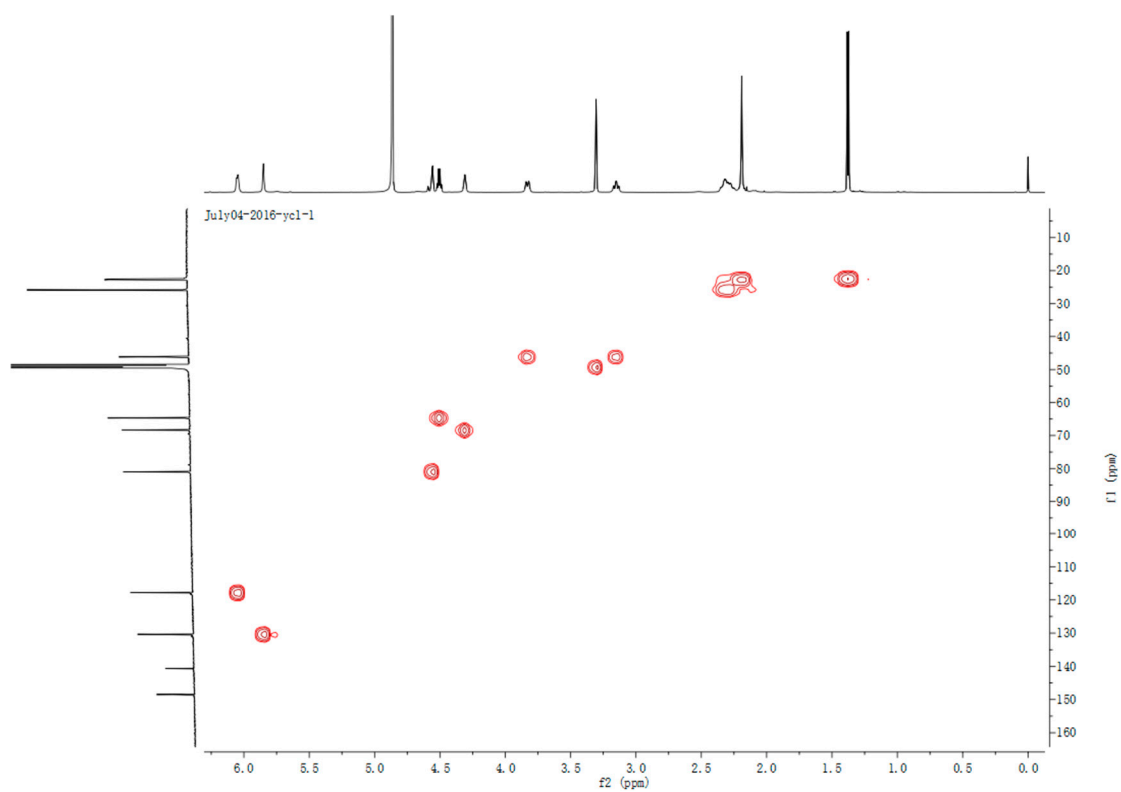

**Figure S6.** HSQC spectrum for **1** in methanol-*d*<sub>4</sub> (600 MHz)

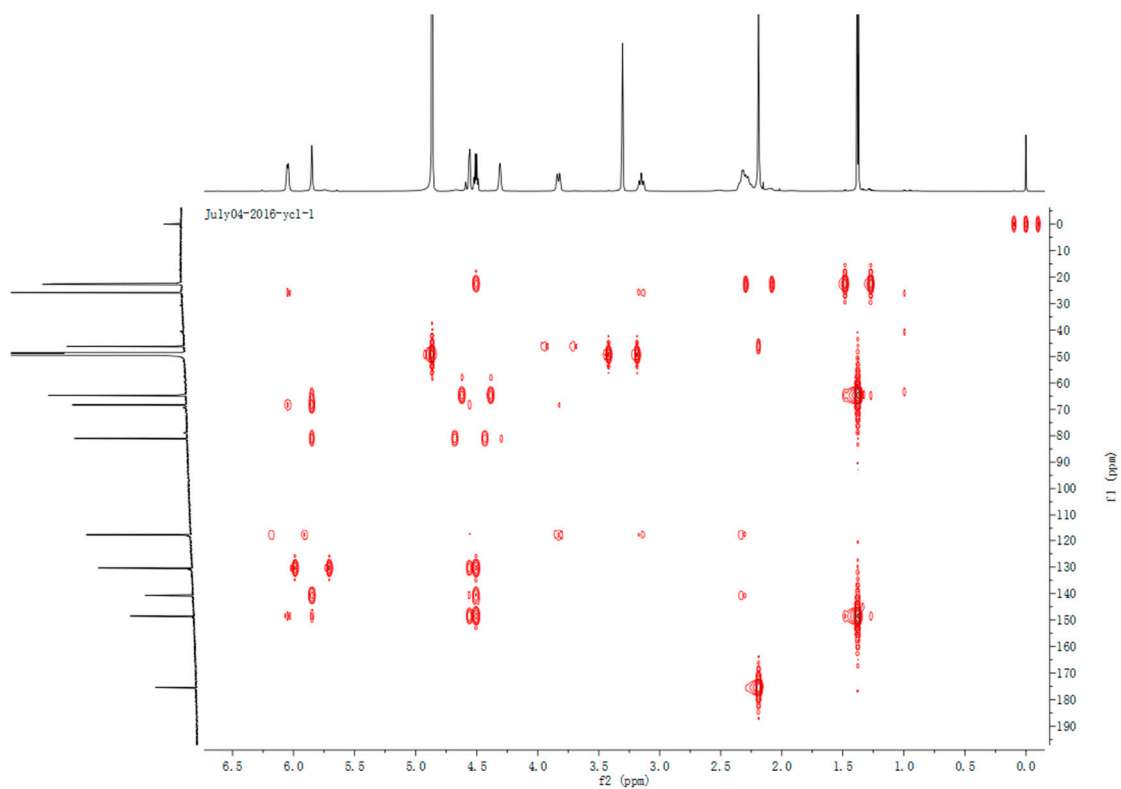

**Figure S7.** HMBC spectrum for **1** in methanol-*d*<sub>4</sub> (600 MHz)

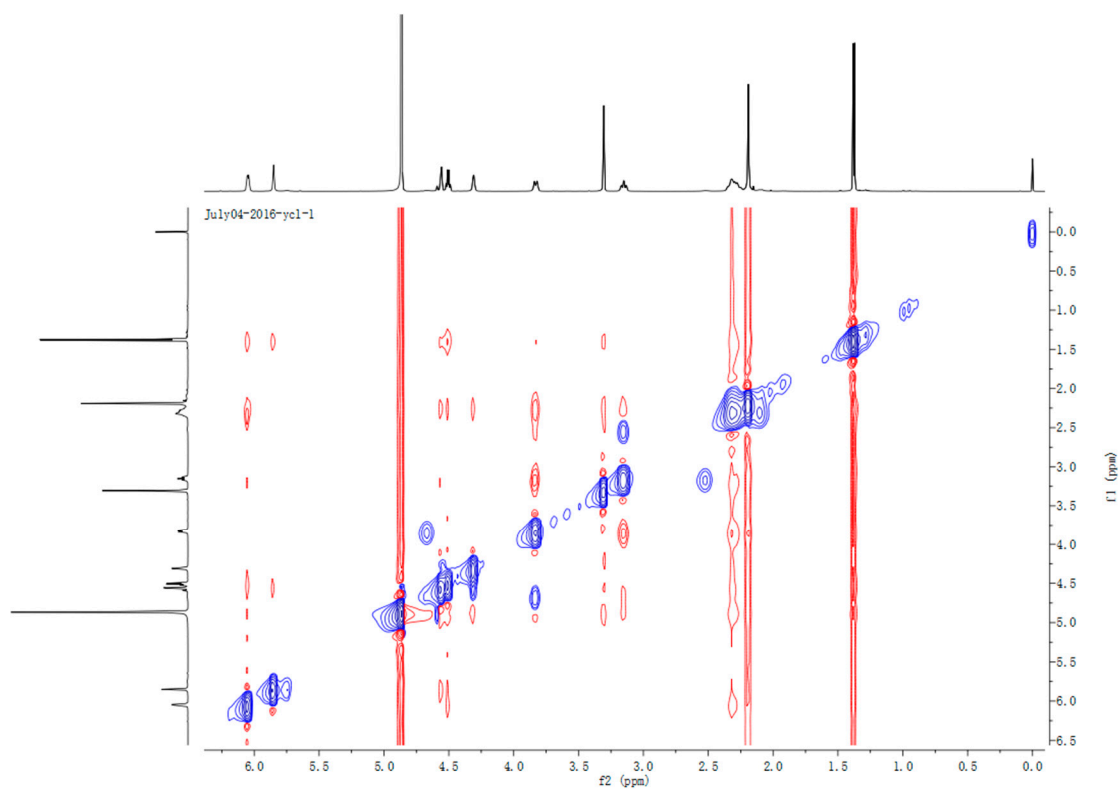

Figure S8. NOESY spectrum for **1** in methanol- $d_4$  (600 MHz)

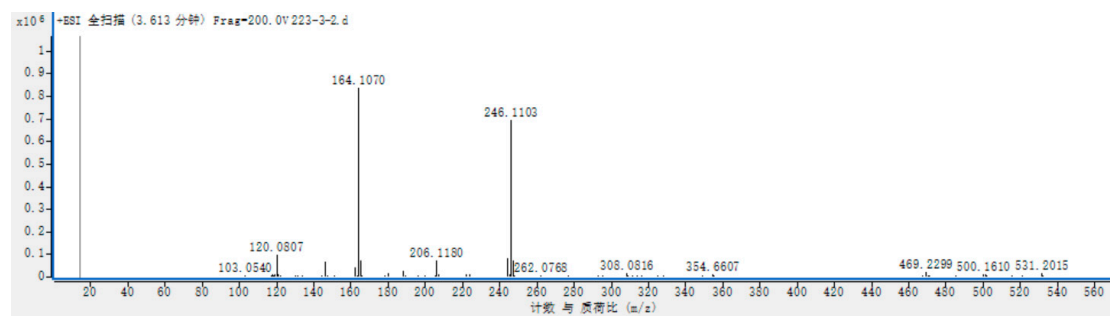

Figure S9. HRESIMS of compound **2**

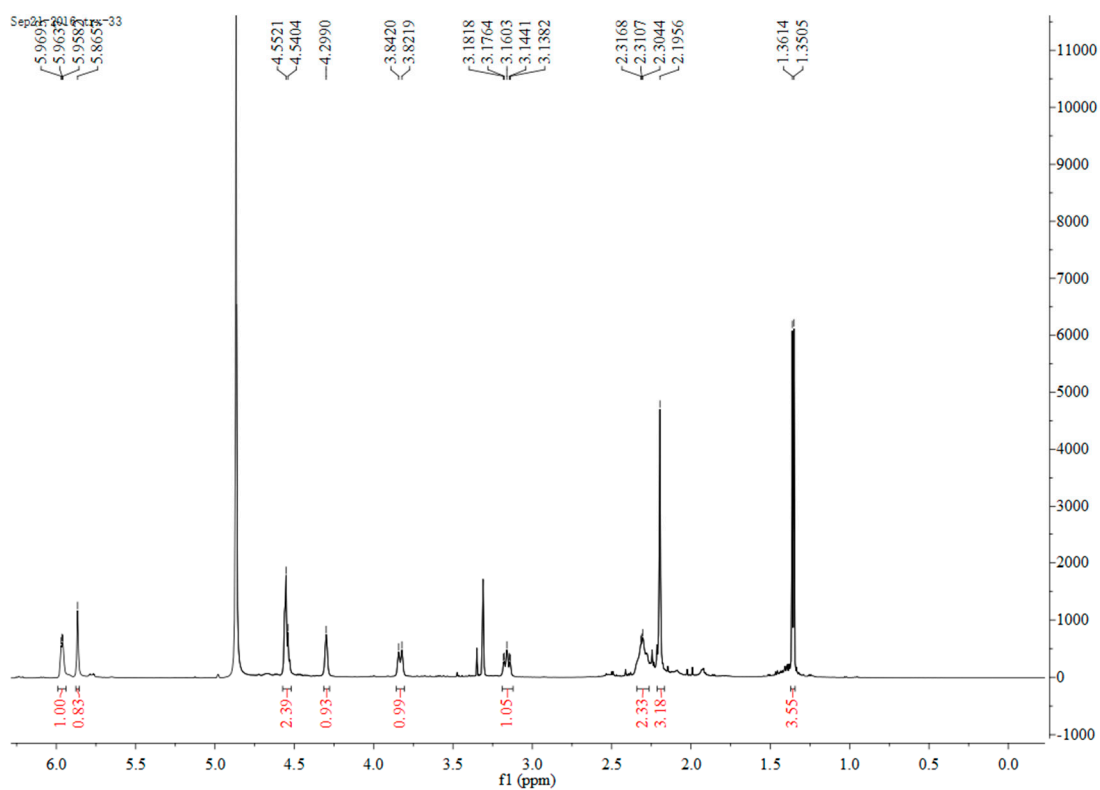

Figure S10.  $^1\text{H}$  NMR spectrum for **2** in methanol- $d_4$  (600 MHz)

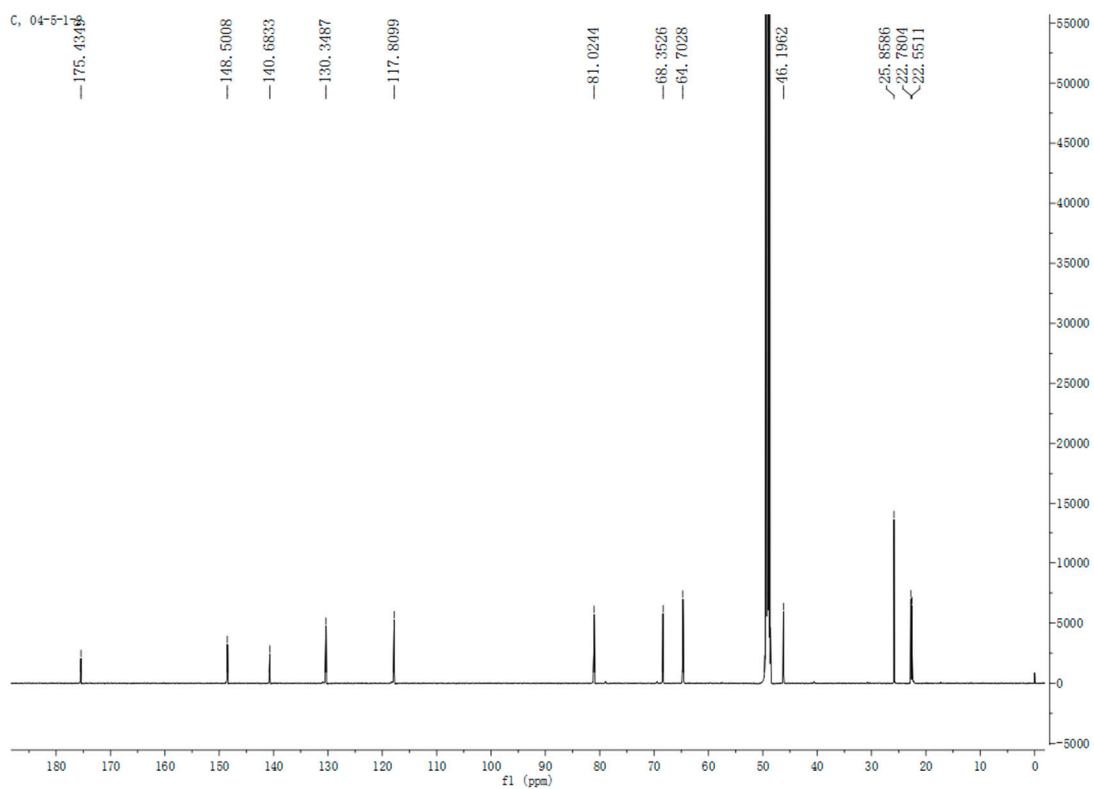

Figure S11.  $^{13}\text{C}$  NMR spectrum for **2** in methanol- $d_4$  (150 MHz)

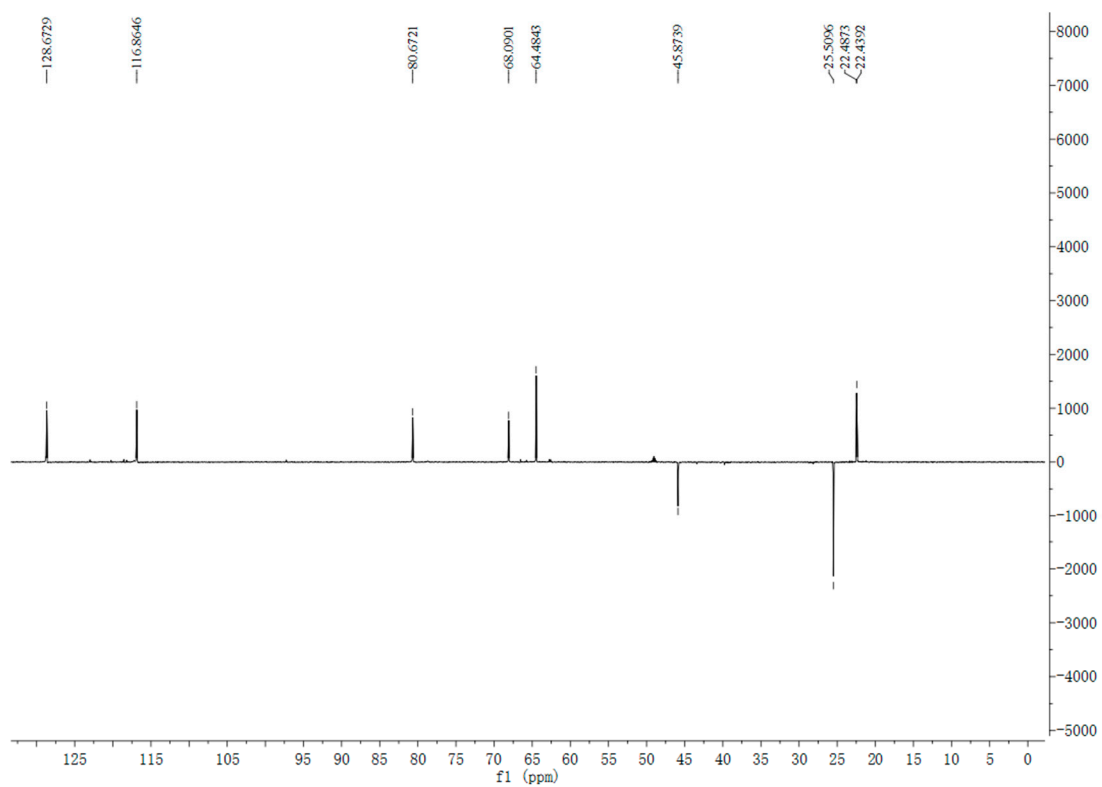

Figure S12. DEPT spectrum for 2 in methanol- $d_4$  (150 MHz)

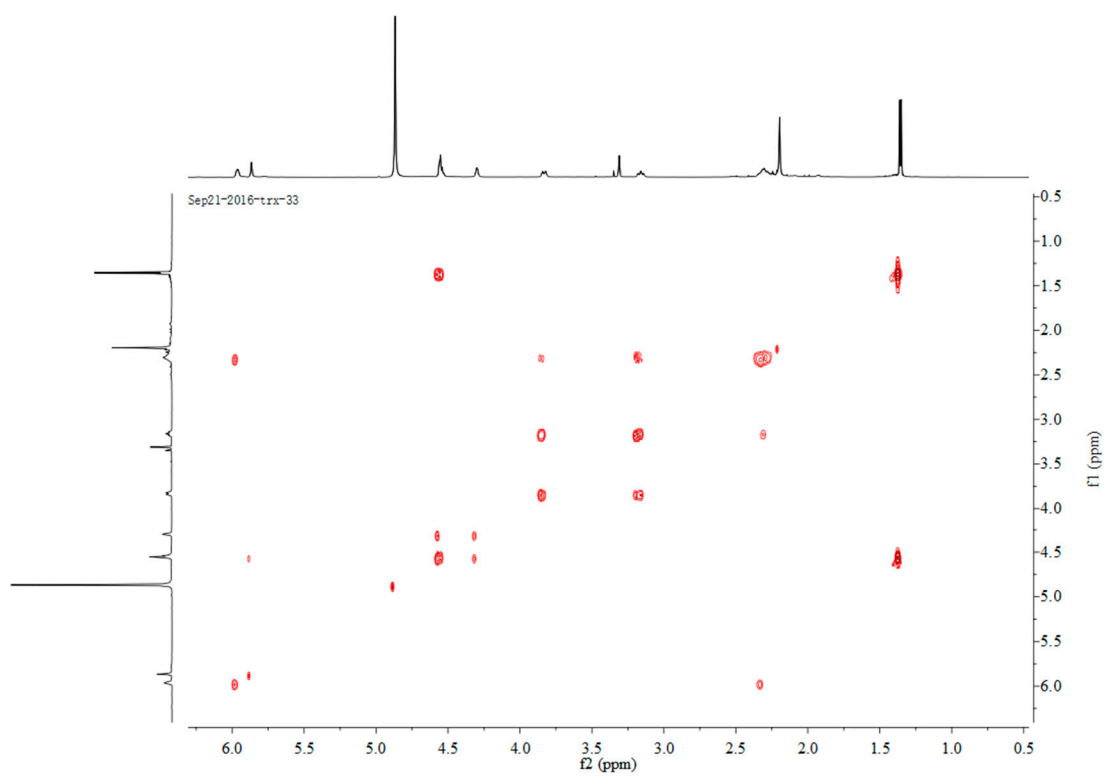



**Figure S13.** COSY spectrum for **2** in methanol- $d_4$  (600 MHz)

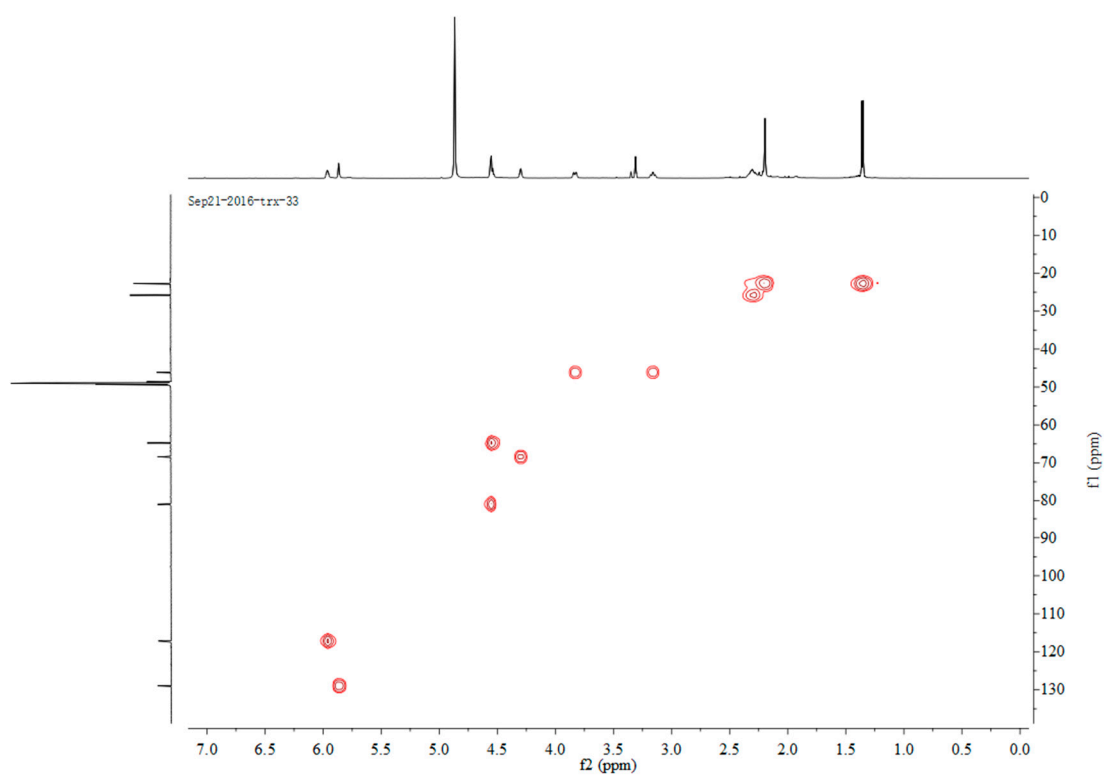

**Figure S14.** HSQC spectrum for **2** in methanol- $d_4$  (600 MHz)

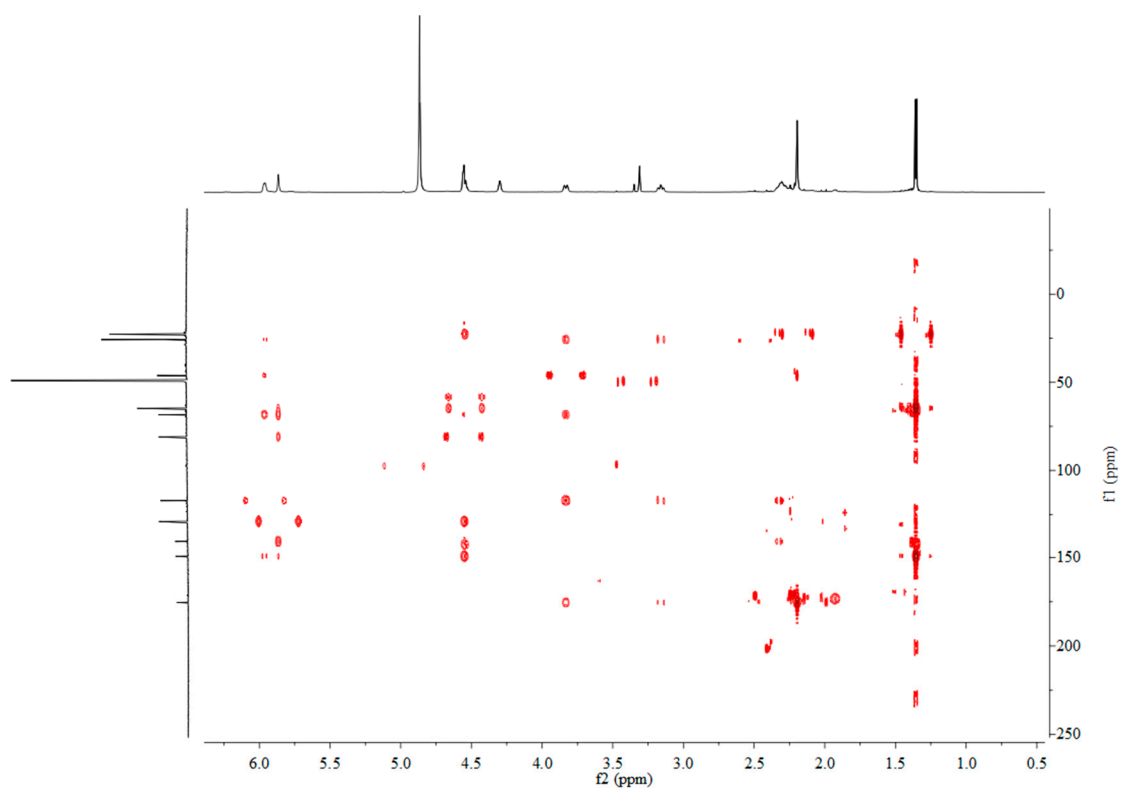

Figure S15. HMBC spectrum for 2 in methanol- $d_4$  (600 MHz)

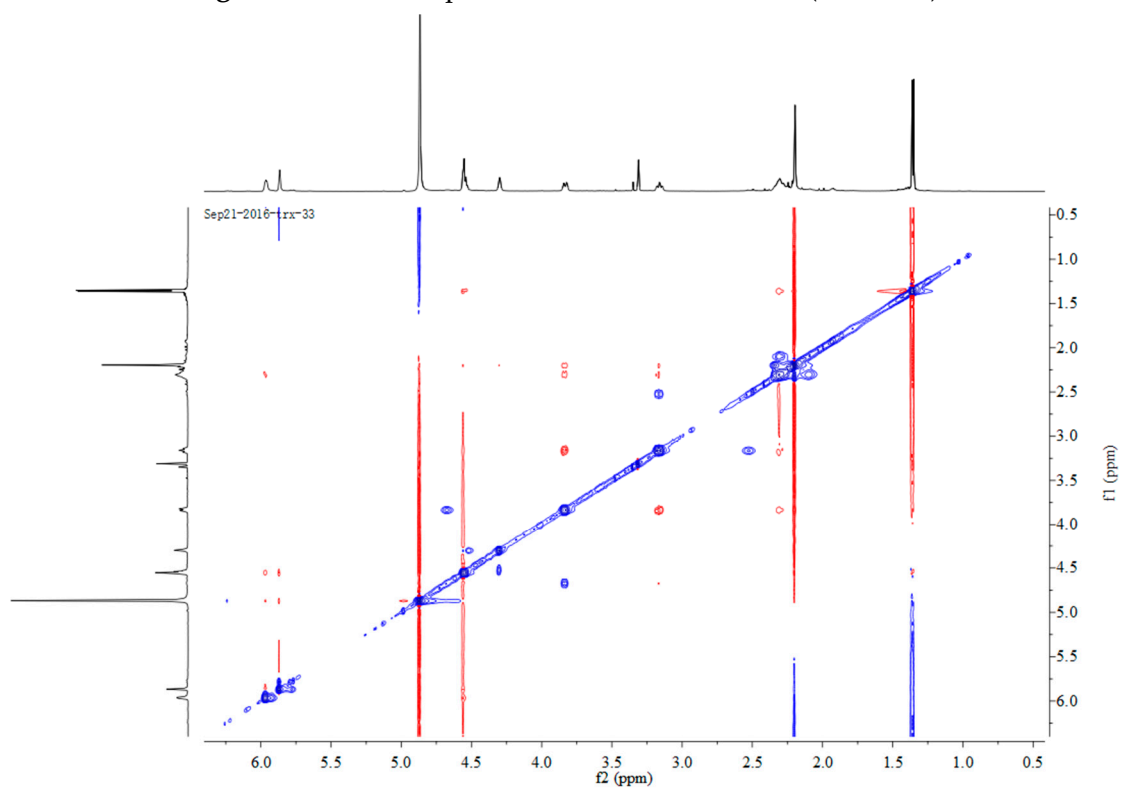

Figure S16. NOESY spectrum for 2 in methanol- $d_4$  (600 MHz)

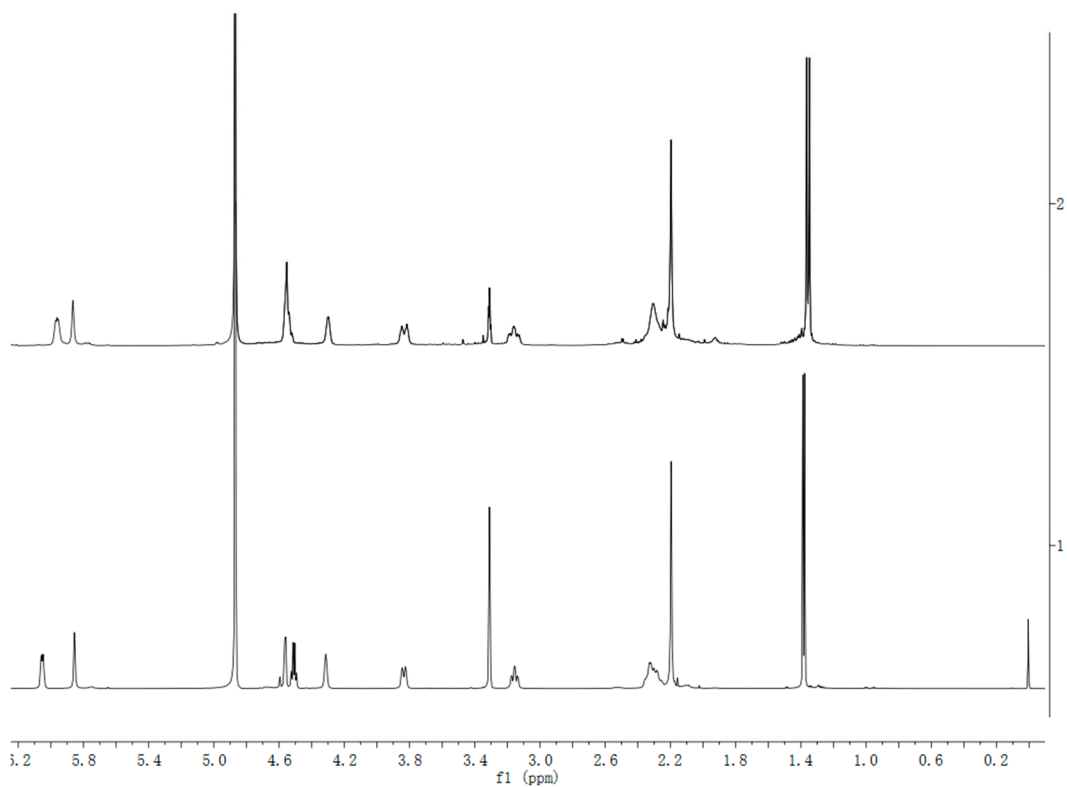

**Figure S17.** Comparison of the  $^1\text{H}$  NMR spectra of compounds **1** and **2**

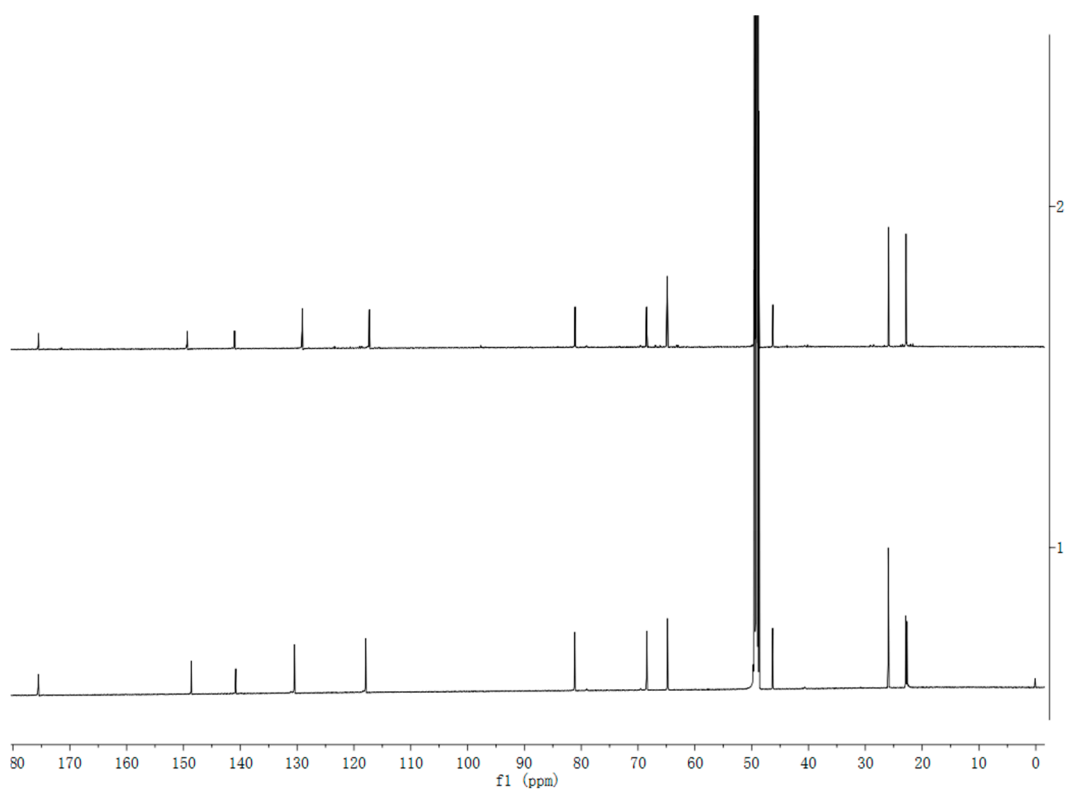

**Figure S18.** Comparison of the  $^{13}\text{C}$  NMR spectra of compounds **1** and **2**
